# Supplementary material for: Thermally activated chain reconfiguration enabled by selenium incorporation for efficient carrier transport in antimony sulfide thin-film solar cells
Source: Royal Society of Chemistry journal article supplement (doi:10.1039/d5ta09426g), 2026-01-01
Supplement: d5ta09426g1.xlsx [file d5ta09426g1.xlsx]

## Sheet: jv
Control		Se
Voltage [V]	Current Density [mA/cm^2]	Voltage [V]	Current Density [mA/cm^2]
1	-12.2676	1	-40.2294
0.98	-11.9876	0.98	-39.3928
0.96	-11.2106	0.96	-36.4062
0.94	-10.5272	0.94	-33.7568
0.92	-9.70572	0.92	-30.438
0.9	-8.80022	0.9	-26.6697
0.88	-7.83213	0.88	-22.5824
0.86	-6.80532	0.86	-18.2958
0.84	-5.70984	0.84	-13.9364
0.82	-4.53252	0.82	-9.64657
0.8	-3.25227	0.8	-5.56772
0.78	-1.85678	0.78	-1.84172
0.76	-0.3511	0.76	1.44383
0.74	1.23216	0.74	4.23479
0.72	2.83841	0.72	6.53231
0.7	4.40929	0.7	8.36816
0.68	5.88224	0.68	9.81563
0.66	7.20515	0.66	10.9401
0.64	8.35047	0.64	11.8122
0.62	9.32074	0.62	12.4945
0.6	10.1209	0.6	13.0394
0.58	10.7713	0.58	13.4831
0.56	11.3009	0.56	13.8521
0.54	11.7338	0.54	14.1658
0.52	12.0942	0.52	14.4397
0.5	12.3975	0.5	14.6811
0.48	12.6585	0.48	14.9007
0.46	12.8871	0.46	15.0995
0.44	13.0928	0.44	15.2864
0.42	13.2797	0.42	15.4597
0.4	13.4541	0.4	15.6233
0.38	13.6167	0.38	15.777
0.36	13.77	0.36	15.9247
0.34	13.9169	0.34	16.0624
0.32	14.057	0.32	16.1957
0.3	14.1933	0.3	16.3243
0.28	14.3262	0.28	16.4435
0.26	14.4576	0.26	16.5602
0.24	14.5847	0.24	16.674
0.22	14.7085	0.22	16.7835
0.2	14.8295	0.2	16.8886
0.18	14.9475	0.18	16.991
0.16	15.0609	0.16	17.0885
0.14	15.1723	0.14	17.1817
0.12	15.2829	0.12	17.2689
0.1	15.3893	0.1	17.3536
0.08	15.4946	0.08	17.4359
0.06	15.5971	0.06	17.5117
0.04	15.6974	0.04	17.5863
0.02	15.7938	0.02	17.6588
0	15.8871	0	17.7279
-0.02	15.9762	-0.02	17.7933
-0.04	16.0637	-0.04	17.8587
-0.06	16.1496	-0.06	17.9194
-0.08	16.2326	-0.08	17.9825
-0.1	16.3208	-0.1	18.0335
