# Supplementary material for: Thermally activated chain reconfiguration enabled by selenium incorporation for efficient carrier transport in antimony sulfide thin-film solar cells
Source: Royal Society of Chemistry journal article supplement (doi:10.1039/d5ta09426g), 2026-01-01
Supplement: d5ta09426g2.xlsx [file d5ta09426g2.xlsx]

## Sheet: eqe
	Control	Se	Control	Se
wavelength [nm]	EQE [%]	EQE [%]	dEQE/dλ	dEQE/dλ
300	18.454	17.817	-0.094	0.174
305	17.122	17.588	0.14	0.314
310	15.79	17.359	0.331	0.427
315	22.386	23.77	0.479	0.513
320	28.982	30.182	0.584	0.572
325	30.281	32.593	0.647	0.604
330	31.58	35.004	0.666	0.609
335	36.235	37.291	0.519	0.481
340	40.89	39.579	0.382	0.372
345	40.912	40.226	0.298	0.31
350	40.933	40.873	0.286	0.303
355	42.943	44.508	0.357	0.368
360	44.953	48.142	0.506	0.507
365	43.785	46.398	0.648	0.644
370	42.616	44.653	0.711	0.705
375	54.299	54.629	0.72	0.715
380	65.982	64.606	0.698	0.697
385	65.669	65.327	0.607	0.622
390	65.356	66.048	0.44	0.48
395	65.214	67.671	0.264	0.324
400	65.072	69.295	0.132	0.198
405	66.15	68.81	0.05	0.104
410	67.227	68.324	0.025	0.047
415	67.526	69.133	0.052	0.043
420	67.825	69.941	0.104	0.081
425	68.925	71.045	0.131	0.11
430	70.024	72.149	0.12	0.112
435	69.877	72.049	0.105	0.112
440	69.729	71.95	0.098	0.114
445	70.571	72.751	0.096	0.113
450	71.413	73.552	0.102	0.116
455	71.922	74.064	0.109	0.123
460	72.43	74.576	0.112	0.132
465	73.002	75.524	0.113	0.138
470	73.574	76.472	0.113	0.139
475	74.048	76.956	0.112	0.137
480	74.522	77.44	0.111	0.134
485	75.294	78.261	0.119	0.14
490	76.066	79.082	0.136	0.156
495	76.492	79.624	0.155	0.177
500	76.918	80.167	0.172	0.198
505	77.927	81.449	0.184	0.217
510	78.935	82.73	0.188	0.231
515	80.229	84.131	0.18	0.234
520	81.523	85.532	0.159	0.222
525	81.926	86.311	0.126	0.195
530	82.328	87.09	0.085	0.156
535	82.595	87.868	0.041	0.112
540	82.862	88.645	-0.004	0.065
545	82.453	88.569	-0.047	0.021
550	82.043	88.493	-0.087	-0.018
555	81.572	88.125	-0.125	-0.052
560	81.1	87.757	-0.158	-0.082
565	80.34	87.407	-0.186	-0.106
570	79.579	87.256	-0.208	-0.127
575	77.973	86.186	-0.223	-0.145
580	76.366	85.29	-0.229	-0.159
585	75.513	84.589	-0.225	-0.169
590	74.66	83.888	-0.21	-0.173
595	73.733	82.956	-0.189	-0.171
600	72.805	82.024	-0.166	-0.163
605	71.798	81.069	-0.146	-0.152
610	70.791	80.114	-0.131	-0.142
615	70.638	79.824	-0.122	-0.133
620	70.485	79.534	-0.117	-0.126
625	69.637	78.72	-0.115	-0.12
630	68.788	77.906	-0.119	-0.115
635	68.166	77.4	-0.128	-0.11
640	67.543	76.894	-0.139	-0.102
645	66.986	76.263	-0.149	-0.096
650	66.428	75.632	-0.155	-0.1
655	65.24	75.052	-0.162	-0.117
660	64.051	74.727	-0.175	-0.15
665	63.512	74.016	-0.196	-0.198
670	62.308	73.534	-0.23	-0.256
675	61.354	71.69	-0.277	-0.319
680	60.165	69.846	-0.333	-0.383
685	58.313	67.401	-0.398	-0.446
690	56.06	64.319	-0.469	-0.511
695	53.25	61.976	-0.541	-0.577
700	50.439	59.762	-0.611	-0.643
705	47.089	56.353	-0.67	-0.709
710	43.738	52.944	-0.715	-0.775
715	40.098	48.461	-0.748	-0.835
720	36.458	43.978	-0.765	-0.882
725	32.387	39.298	-0.769	-0.909
730	28.315	34.617	-0.761	-0.914
735	24.63	30.063	-0.742	-0.896
740	20.944	25.508	-0.712	-0.86
745	17.695	21.729	-0.67	-0.81
750	14.446	17.95	-0.618	-0.75
755	11.604	14.407	-0.556	-0.679
760	8.762	10.864	-0.486	-0.598
765	6.534	8.084	-0.412	-0.509
770	4.307	5.305	-0.335	-0.414
775	3.1	3.838	-0.259	-0.318
780	1.892	2.371	-0.187	-0.229
785	1.44	1.782	-0.126	-0.154
790	0.988	1.193	-0.077	-0.096
795	0.734	1.004	-0.043	-0.056
800	0.48	0.815	-0.023	-0.034
805	0.478	0.68	-0.013	-0.024
810	0.477	0.545	-0.01	-0.021
815	0.35	0.238	-0.011	-0.021
820	0.224	-0.069	-0.014	-0.019
825	0.169	0.017	-0.015	-0.015
830	0.115	0.104	-0.014	-0.008
835	0.025	0.017	-0.011	-0.002
840	-0.064	-0.069	-0.006	0
845	-0.124	-0.123	-0.001	0
850	-0.185	-0.177	0.004	-0.004
855	-0.057	0.082	0.006	-0.009
860	0.07	0.341	0.006	-0.011
865	0.137	-0.097	0.004	-0.01
870	0.205	-0.535	0	-0.007
875	0.084	-0.448	-0.005	-0.002
880	-0.037	-0.36	-0.005	-0.001
885	-0.084	-0.222	-0.005	0.001
890	-0.131	-0.083	-0.004	0.002
895	-0.106	-0.091	-0.003	0.004
900	-0.081	-0.098	-0.001	0.006
905	-0.075	-0.1	0.002	0.009

## Sheet: Current Density
	Control	Se
wavelength [nm]	Current Density [mA/cm^2]	Current Density [mA/cm^2]
300	0.000184745	0.00018907
305	0.000860862	0.000919865
310	0.0033	0.00353
315	0.00908	0.00958
320	0.01845	0.01954
325	0.03389	0.03648
330	0.05515	0.05914
335	0.08057	0.08444
340	0.1077	0.1109
345	0.13602	0.13898
350	0.17006	0.17368
355	0.20837	0.21407
360	0.24799	0.25626
365	0.29209	0.30271
370	0.34029	0.35221
375	0.39991	0.41124
380	0.46968	0.48009
385	0.54498	0.55564
390	0.62789	0.64057
395	0.72832	0.74637
400	0.84897	0.87332
405	0.96943	0.99723
410	1.09696	1.12736
415	1.23074	1.2648
420	1.36902	1.40736
425	1.49588	1.5381
430	1.6253	1.67151
435	1.78513	1.83637
440	1.96121	2.01797
445	2.15483	2.21748
450	2.35634	2.425
455	2.55952	2.63422
460	2.76731	2.84868
465	2.9775	3.06665
470	3.19741	3.2952
475	3.42891	3.53578
480	3.66109	3.77708
485	3.8985	4.02388
490	4.14629	4.28165
495	4.39197	4.53754
500	4.63585	4.79209
505	4.88558	5.05347
510	5.13882	5.31897
515	5.39664	5.58939
520	5.66374	5.87022
525	5.9365	6.15817
530	6.21081	6.44918
535	6.48298	6.73952
540	6.75659	7.03285
545	7.03656	7.3342
550	7.31938	7.6395
555	7.59708	7.93975
560	7.87119	8.23718
565	8.14583	8.53713
570	8.41493	8.83337
575	8.68266	9.13085
580	8.9533	9.43357
585	9.21155	9.72328
590	9.45989	10.0025
595	9.7164	10.2913
600	9.9768	10.585
605	10.2351	10.877
610	10.4917	11.1672
615	10.7504	11.4593
620	11.0033	11.7449
625	11.2481	12.0219
630	11.496	12.303
635	11.7471	12.5885
640	11.999	12.8753
645	12.2443	13.1546
650	12.4789	13.4231
655	12.7145	13.6961
660	12.9548	13.9763
665	13.1954	14.2584
670	13.4314	14.5356
675	13.6632	14.8056
680	13.8892	15.0673
685	14.0921	15.3011
690	14.2792	15.5173
695	14.4654	15.7359
700	14.6451	15.9499
705	14.8161	16.1556
710	14.9713	16.3434
715	15.0962	16.4943
720	15.1975	16.6168
725	15.2937	16.734
730	15.3852	16.8457
735	15.4678	16.9464
740	15.5391	17.0336
745	15.5993	17.1079
750	15.6481	17.1686
755	15.6736	17.2002
760	15.684	17.2131
765	15.6987	17.2312
770	15.7122	17.2479
775	15.7214	17.2593
780	15.7275	17.2669
785	15.7318	17.2722
790	15.7348	17.2761
795	15.7369	17.2792
800	15.7386	17.2818
805	15.7402	17.2839
810	15.7416	17.2852
815	15.7424	17.2854
820	15.743	17.2854
825	15.7434	17.2856
830	15.7437	17.2857
835	15.7436	17.2857
840	15.7433	17.2853
845	15.7428	17.2848
850	15.7424	17.2847
855	15.7424	17.2854
860	15.7428	17.2858
865	15.7433	17.2848
870	15.7438	17.2831
875	15.7439	17.2818
880	15.7437	17.2808
885	15.7433	17.2803
890	15.743	17.28
895	15.7427	17.2798
900	15.7425	17.2795
905	15.7423	17.2793
